# Supplementary material for: Density dependent attributes of fish aggregative behaviour
Source: PeerJ. 2019 Feb 4;7:e6378. doi: 10.7717/peerj.6378 (PMC6366398; doi:10.7717/peerj.6378)
Supplement: Supplemental Information 1 [file peerj-07-6378-s001.xlsx]

## Sheet: Data
Season	Date	Hour	Count_of_fish_[ind.]	Singletons_[ind.]	Fish_in_pairs_[ind.]	Fish_in_schools_[ind.]	School_size_[avg.ind./h]	Count_of_schools	Count_of_clusters	Proportion_of_singletons	Proportion_in_pairs	Proportion_in_schools	Cluster.size
2005	31.5.	8	9	7	2	0	0	0	8	0.777778	0.222222	0	1.125
2005	31.5.	9	34	18	6	10	5	2	23	0.529412	0.176471	0.294118	1.47826
2005	31.5.	10	19	5	2	12	6	2	8	0.263158	0.105263	0.631579	2.375
2005	31.5.	11	24	14	4	6	6	1	17	0.583333	0.166667	0.25	1.41176
2005	31.5.	12	23	12	0	11	11	1	13	0.521739	0	0.478261	1.76923
2005	31.5.	13	12	3	4	5	5	1	6	0.25	0.333333	0.416667	2
2005	31.5.	14	5	3	2	0	0	0	4	0.6	0.4	0	1.25
2005	31.5.	15	13	9	4	0	0	0	11	0.692308	0.307692	0	1.18182
2005	31.5.	16	6	4	2	0	0	0	5	0.666667	0.333333	0	1.2
2005	31.5.	17	10	8	2	0	0	0	9	0.8	0.2	0	1.11111
2005	31.5.	18	8	2	2	4	4	1	4	0.25	0.25	0.5	2
2005	31.5.	19	4	2	2	0	0	0	3	0.5	0.5	0	1.33333
2005	31.5.	20	0	0	0	0	0	0	0	0	0	0	0
2005	1.6.	9	68	7	0	61	15.25	4	11	0.102941	0	0.897059	6.18182
2005	1.6.	10	6	4	2	0	0	0	5	0.666667	0.333333	0	1.2
2005	1.6.	11	36	10	2	24	8	3	14	0.277778	0.0555556	0.666667	2.57143
2005	1.6.	12	47	12	2	33	33	1	14	0.255319	0.0425532	0.702128	3.35714
2005	1.6.	13	34	12	0	22	7.33333	3	15	0.352941	0	0.647059	2.26667
2005	1.6.	14	31	12	6	13	4.33333	3	18	0.387097	0.193548	0.419355	1.72222
2005	1.6.	15	52	16	2	34	8.5	4	21	0.307692	0.0384615	0.653846	2.47619
2005	1.6.	16	24	11	10	3	3	1	17	0.458333	0.416667	0.125	1.41176
2005	1.6.	17	23	4	4	15	7.5	2	8	0.173913	0.173913	0.652174	2.875
2005	1.6.	18	13	5	0	8	8	1	6	0.384615	0	0.615385	2.16667
2005	1.6.	19	29	4	2	23	23	1	6	0.137931	0.0689655	0.793103	4.83333
2005	1.6.	20	12	8	4	0	0	0	10	0.666667	0.333333	0	1.2
2005	2.6.	5	20	13	4	3	3	1	16	0.65	0.2	0.15	1.25
2005	2.6.	6	17	11	2	4	4	1	13	0.647059	0.117647	0.235294	1.30769
2005	2.6.	7	14	8	2	4	4	1	10	0.571429	0.142857	0.285714	1.4
2005	2.6.	8	16	3	2	11	5.5	2	6	0.1875	0.125	0.6875	2.66667
2005	2.6.	9	11	4	2	5	5	1	6	0.363636	0.181818	0.454545	1.83333
2005	2.6.	10	7	4	0	3	3	1	5	0.571429	0	0.428571	1.4
2005	2.6.	11	8	6	2	0	0	0	7	0.75	0.25	0	1.14286
2005	2.6.	12	28	14	4	10	5	2	18	0.5	0.142857	0.357143	1.55556
2005	2.6.	13	16	14	2	0	0	0	15	0.875	0.125	0	1.06667
2005	2.6.	14	14	7	4	3	3	1	10	0.5	0.285714	0.214286	1.4
2005	2.6.	15	9	5	4	0	0	0	7	0.555556	0.444444	0	1.28571
2005	2.6.	16	11	11	0	0	0	0	11	1	0	0	1
2005	2.6.	17	13	6	4	3	3	1	9	0.461538	0.307692	0.230769	1.44444
2005	2.6.	18	12	12	0	0	0	0	12	1	0	0	1
2005	2.6.	19	18	12	6	0	0	0	15	0.666667	0.333333	0	1.2
2005	2.6.	20	48	15	4	29	9.66667	3	20	0.3125	0.0833333	0.604167	2.4
2005	3.6.	5	10	10	0	0	0	0	10	1	0	0	1
2005	3.6.	6	9	9	0	0	0	0	9	1	0	0	1
2005	3.6.	7	13	9	4	0	0	0	11	0.692308	0.307692	0	1.18182
2005	3.6.	8	7	7	0	0	0	0	7	1	0	0	1
2005	3.6.	9	1	1	0	0	0	0	1	1	0	0	1
2005	3.6.	10	29	4	0	25	8.33333	3	7	0.137931	0	0.862069	4.14286
2005	3.6.	11	12	9	0	3	3	1	10	0.75	0	0.25	1.2
2005	3.6.	12	12	8	4	0	0	0	10	0.666667	0.333333	0	1.2
2005	3.6.	13	17	5	0	12	6	2	7	0.294118	0	0.705882	2.42857
2005	3.6.	14	24	14	4	6	3	2	18	0.583333	0.166667	0.25	1.33333
2005	3.6.	15	9	6	0	3	3	1	7	0.666667	0	0.333333	1.28571
2005	3.6.	16	6	4	2	0	0	0	5	0.666667	0.333333	0	1.2
2005	3.6.	17	6	3	0	3	3	1	4	0.5	0	0.5	1.5
2005	3.6.	18	20	9	2	9	3	3	13	0.45	0.1	0.45	1.53846
2005	3.6.	19	18	9	2	7	3.5	2	12	0.5	0.111111	0.388889	1.5
2005	3.6.	20	9	6	0	3	3	1	7	0.666667	0	0.333333	1.28571
2005	4.6.	5	15	12	0	3	3	1	13	0.8	0	0.2	1.15385
2005	4.6.	6	9	4	2	3	3	1	6	0.444444	0.222222	0.333333	1.5
2005	4.6.	7	13	9	4	0	0	0	11	0.692308	0.307692	0	1.18182
2005	4.6.	8	13	8	0	5	5	1	9	0.615385	0	0.384615	1.44444
2005	4.6.	9	20	8	2	10	5	2	11	0.4	0.1	0.5	1.81818
2005	4.6.	10	4	2	2	0	0	0	3	0.5	0.5	0	1.33333
2005	4.6.	11	25	9	4	12	4	3	14	0.36	0.16	0.48	1.78571
2005	4.6.	12	15	11	4	0	0	0	13	0.733333	0.266667	0	1.15385
2005	4.6.	13	15	15	0	0	0	0	15	1	0	0	1
2005	4.6.	14	15	8	4	3	3	1	11	0.533333	0.266667	0.2	1.36364
2005	4.6.	15	39	15	4	20	10	2	19	0.384615	0.102564	0.512821	2.05263
2005	4.6.	16	16	13	0	3	3	1	14	0.8125	0	0.1875	1.14286
2005	4.6.	17	10	10	0	0	0	0	10	1	0	0	1
2005	4.6.	18	7	4	0	3	3	1	5	0.571429	0	0.428571	1.4
2005	4.6.	19	24	11	2	11	11	1	13	0.458333	0.0833333	0.458333	1.84615
2005	4.6.	20	15	13	2	0	0	0	14	0.866667	0.133333	0	1.07143
2005	5.6.	5	21	9	4	8	8	1	12	0.428571	0.190476	0.380952	1.75
2005	5.6.	6	17	8	4	5	5	1	11	0.470588	0.235294	0.294118	1.54545
2005	5.6.	7	5	3	2	0	0	0	4	0.6	0.4	0	1.25
2005	5.6.	8	25	4	4	17	17	1	7	0.16	0.16	0.68	3.57143
2005	5.6.	9	17	12	0	5	5	1	13	0.705882	0	0.294118	1.30769
2005	5.6.	10	15	10	2	3	3	1	12	0.666667	0.133333	0.2	1.25
2005	5.6.	11	23	11	2	10	5	2	14	0.478261	0.0869565	0.434783	1.64286
2005	5.6.	12	8	4	0	4	4	1	5	0.5	0	0.5	1.6
2005	5.6.	13	11	1	6	4	4	1	5	0.0909091	0.545455	0.363636	2.2
2005	5.6.	14	18	1	2	15	15	1	3	0.0555556	0.111111	0.833333	6
2005	5.6.	15	6	2	0	4	4	1	3	0.333333	0	0.666667	2
2005	5.6.	16	12	2	0	10	5	2	4	0.166667	0	0.833333	3
2005	5.6.	17	4	2	2	0	0	0	3	0.5	0.5	0	1.33333
2005	5.6.	18	9	4	2	3	3	1	6	0.444444	0.222222	0.333333	1.5
2005	5.6.	19	16	3	0	13	4.33333	3	6	0.1875	0	0.8125	2.66667
2005	5.6.	20	95	15	4	76	9.5	8	25	0.157895	0.0421053	0.8	3.8
2012	29.5.	13	2	2	0	0	0	0	2	1	0	0	1
2012	29.5.	14	9	4	2	3	3	1	6	0.444444	0.222222	0.333333	1.5
2012	29.5.	15	19	11	0	8	4	2	13	0.578947	0	0.421053	1.46154
2012	29.5.	16	4	2	2	0	0	0	3	0.5	0.5	0	1.33333
2012	29.5.	17	11	9	2	0	0	0	10	0.818182	0.181818	0	1.1
2012	29.5.	18	3	3	0	0	0	0	3	1	0	0	1
2012	29.5.	19	3	3	0	0	0	0	3	1	0	0	1
2012	29.5.	20	7	5	2	0	0	0	6	0.714286	0.285714	0	1.16667
2012	30.5.	5	0	0	0	0	0	0	0	0	0	0	0
2012	30.5.	6	1	1	0	0	0	0	1	1	0	0	1
2012	30.5.	7	0	0	0	0	0	0	0	0	0	0	0
2012	30.5.	8	2	2	0	0	0	0	2	1	0	0	1
2012	30.5.	11	4	2	2	0	0	0	3	0.5	0.5	0	1.33333
2012	30.5.	12	9	9	0	0	0	0	9	1	0	0	1
2012	30.5.	13	2	2	0	0	0	0	2	1	0	0	1
2012	30.5.	14	6	6	0	0	0	0	6	1	0	0	1
2012	30.5.	15	12	4	2	6	6	1	6	0.333333	0.166667	0.5	2
2012	30.5.	16	4	4	0	0	0	0	4	1	0	0	1
2012	30.5.	17	19	10	6	3	3	1	14	0.526316	0.315789	0.157895	1.35714
2012	30.5.	18	8	4	4	0	0	0	6	0.5	0.5	0	1.33333
2012	30.5.	19	17	9	4	4	4	1	12	0.529412	0.235294	0.235294	1.41667
2012	30.5.	20	9	9	0	0	0	0	9	1	0	0	1
2012	31.5.	10	4	4	0	0	0	0	4	1	0	0	1
2012	31.5.	11	7	3	4	0	0	0	5	0.428571	0.571429	0	1.4
2012	31.5.	12	13	6	2	5	5	1	8	0.461538	0.153846	0.384615	1.625
2012	31.5.	13	9	7	2	0	0	0	8	0.777778	0.222222	0	1.125
2012	31.5.	14	9	4	2	3	3	1	6	0.444444	0.222222	0.333333	1.5
2012	31.5.	15	13	8	0	5	5	1	9	0.615385	0	0.384615	1.44444
2012	31.5.	16	8	2	6	0	0	0	5	0.25	0.75	0	1.6
2012	31.5.	17	11	7	4	0	0	0	9	0.636364	0.363636	0	1.22222
2012	31.5.	18	7	7	0	0	0	0	7	1	0	0	1
2012	31.5.	19	3	1	2	0	0	0	2	0.333333	0.666667	0	1.5
2012	31.5.	20	20	11	6	3	3	1	15	0.55	0.3	0.15	1.33333
2012	1.6.	5	2	2	0	0	0	0	2	1	0	0	1
2012	1.6.	6	3	3	0	0	0	0	3	1	0	0	1
2012	1.6.	7	3	3	0	0	0	0	3	1	0	0	1
2012	1.6.	8	7	7	0	0	0	0	7	1	0	0	1
2012	1.6.	9	11	7	4	0	0	0	9	0.636364	0.363636	0	1.22222
2012	1.6.	10	15	7	8	0	0	0	11	0.466667	0.533333	0	1.36364
2012	1.6.	11	5	3	2	0	0	0	4	0.6	0.4	0	1.25
2012	1.6.	12	7	3	4	0	0	0	5	0.428571	0.571429	0	1.4
2012	1.6.	13	13	4	6	3	3	1	8	0.307692	0.461538	0.230769	1.625
2012	1.6.	14	21	4	2	15	3.75	4	9	0.190476	0.0952381	0.714286	2.33333
2012	1.6.	15	1	1	0	0	0	0	1	1	0	0	1
2012	1.6.	16	0	0	0	0	0	0	0	0	0	0	0
2012	1.6.	17	0	0	0	0	0	0	0	0	0	0	0
2012	1.6.	18	5	3	2	0	0	0	4	0.6	0.4	0	1.25
2012	1.6.	19	3	3	0	0	0	0	3	1	0	0	1
2012	2.6.	5	5	5	0	0	0	0	5	1	0	0	1
2012	2.6.	6	2	2	0	0	0	0	2	1	0	0	1
2012	2.6.	7	1	1	0	0	0	0	1	1	0	0	1
2012	2.6.	12	10	3	0	7	3.5	2	5	0.3	0	0.7	2
2012	2.6.	13	5	5	0	0	0	0	5	1	0	0	1
2012	2.6.	14	2	2	0	0	0	0	2	1	0	0	1
2012	2.6.	15	14	11	0	3	3	1	12	0.785714	0	0.214286	1.16667
2012	2.6.	16	3	3	0	0	0	0	3	1	0	0	1
2012	2.6.	17	2	2	0	0	0	0	2	1	0	0	1
2012	2.6.	18	6	6	0	0	0	0	6	1	0	0	1
2012	2.6.	19	6	6	0	0	0	0	6	1	0	0	1
2012	2.6.	20	17	9	4	4	0	0	12	0.529412	0.235294	0.235294	1.41667
2012	3.6.	5	1	1	0	0	0	0	1	1	0	0	1
2012	3.6.	6	2	0	2	0	0	0	1	0	1	0	2
2012	3.6.	7	3	3	0	0	0	0	3	1	0	0	1
2012	3.6.	8	2	2	0	0	0	0	2	1	0	0	1
2012	3.6.	9	5	5	0	0	0	0	5	1	0	0	1
2012	3.6.	10	5	5	0	0	0	0	5	1	0	0	1
2012	3.6.	11	6	4	2	0	0	0	5	0.666667	0.333333	0	1.2
2012	3.6.	12	12	8	4	0	0	0	10	0.666667	0.333333	0	1.2
2012	3.6.	13	23	14	2	7	3.5	2	17	0.608696	0.0869565	0.304348	1.35294
2012	3.6.	14	15	10	2	3	3	1	12	0.666667	0.133333	0.2	1.25
2012	3.6.	15	12	7	0	5	5	1	8	0.583333	0	0.416667	1.5
2012	3.6.	16	15	9	6	0	0	0	12	0.6	0.4	0	1.25
2012	3.6.	17	7	7	0	0	0	0	7	1	0	0	1
2012	3.6.	18	0	0	0	0	0	0	0	0	0	0	0
2012	3.6.	19	6	4	2	0	0	0	5	0.666667	0.333333	0	1.2
2012	3.6.	20	4	4	0	0	0	0	4	1	0	0	1
2012	4.6.	5	8	8	0	0	0	0	8	1	0	0	1
2012	4.6.	6	6	6	0	0	0	0	6	1	0	0	1
2012	4.6.	7	8	8	0	0	0	0	8	1	0	0	1
2012	4.6.	8	11	3	4	4	4	1	6	0.272727	0.363636	0.363636	1.83333
2012	4.6.	9	8	8	0	0	0	0	8	1	0	0	1
2012	4.6.	10	12	8	4	0	0	0	10	0.666667	0.333333	0	1.2
2012	4.6.	11	5	5	0	0	0	0	5	1	0	0	1
2012	4.6.	12	23	13	2	8	4	2	16	0.565217	0.0869565	0.347826	1.4375
2012	4.6.	13	18	14	4	0	0	0	16	0.777778	0.222222	0	1.125
2014	15.5.	5	11	9	2	0	0	0	10	0.818182	0.181818	0	1.1
2014	15.5.	6	6	2	4	0	0	0	4	0.333333	0.666667	0	1.5
2014	15.5.	7	2	2	0	0	0	0	2	1	0	0	1
2014	15.5.	8	8	1	2	5	5	1	3	0.125	0.25	0.625	2.66667
2014	15.5.	9	0	0	0	0	0	0	0	0	0	0	0
2014	15.5.	10	1	1	0	0	0	0	1	1	0	0	1
2014	15.5.	11	0	0	0	0	0	0	0	0	0	0	0
2014	15.5.	12	0	0	0	0	0	0	0	0	0	0	0
2014	15.5.	13	0	0	0	0	0	0	0	0	0	0	0
2014	15.5.	14	0	0	0	0	0	0	0	0	0	0	0
2014	15.5.	15	0	0	0	0	0	0	0	0	0	0	0
2014	15.5.	16	1	1	0	0	0	0	1	1	0	0	1
2014	15.5.	17	1	1	0	0	0	0	1	1	0	0	1
2014	15.5.	18	0	0	0	0	0	0	0	0	0	0	0
2014	15.5.	19	0	0	0	0	0	0	0	0	0	0	0
2014	15.5.	20	6	2	0	4	4	1	3	0.333333	0	0.666667	2
2014	16.5.	5	2	2	0	0	0	0	2	1	0	0	1
2014	16.5.	6	9	5	0	4	4	1	6	0.555556	0	0.444444	1.5
2014	16.5.	7	6	6	0	0	0	0	6	1	0	0	1
2014	16.5.	10	14	14	0	0	0	0	14	1	0	0	1
2014	16.5.	11	10	10	0	0	0	0	10	1	0	0	1
2014	16.5.	12	6	6	0	0	0	0	6	1	0	0	1
2014	16.5.	13	0	0	0	0	0	0	0	0	0	0	0
2014	16.5.	14	0	0	0	0	0	0	0	0	0	0	0
2014	16.5.	15	5	2	0	3	3	1	3	0.4	0	0.6	1.66667
2014	16.5.	16	2	2	0	0	0	0	2	1	0	0	1
2014	16.5.	17	8	0	0	8	8	1	1	0	0	1	8
2014	16.5.	18	1	1	0	0	0	0	1	1	0	0	1
2014	16.5.	19	1	1	0	0	0	0	1	1	0	0	1
2014	16.5.	20	3	3	0	0	0	0	3	1	0	0	1
2014	17.5.	5	2	2	0	0	0	0	2	1	0	0	1
2014	17.5.	6	4	2	2	0	0	0	3	0.5	0.5	0	1.33333
2014	17.5.	7	4	4	0	0	0	0	4	1	0	0	1
2014	17.5.	8	0	0	0	0	0	0	0	0	0	0	0
2014	17.5.	11	7	5	2	0	0	0	6	0.714286	0.285714	0	1.16667
2014	17.5.	12	1	1	0	0	0	0	1	1	0	0	1
2014	17.5.	13	2	0	2	0	0	0	1	0	1	0	2
2014	17.5.	14	8	5	0	3	3	1	6	0.625	0	0.375	1.33333
2014	17.5.	15	12	2	2	8	4	2	5	0.166667	0.166667	0.666667	2.4
2014	17.5.	16	2	2	0	0	0	0	2	1	0	0	1
2014	17.5.	17	5	3	2	0	0	0	4	0.6	0.4	0	1.25
2014	17.5.	18	5	5	0	0	0	0	5	1	0	0	1
2014	17.5.	19	4	4	0	0	0	0	4	1	0	0	1
2014	17.5.	20	2	2	0	0	0	0	2	1	0	0	1
2014	18.5.	6	4	2	2	0	0	0	3	0.5	0.5	0	1.33333
2014	18.5.	7	3	1	2	0	0	0	2	0.333333	0.666667	0	1.5
2014	18.5.	8	0	0	0	0	0	0	0	0	0	0	0
2014	18.5.	9	1	1	0	0	0	0	1	1	0	0	1
2014	18.5.	10	4	1	0	3	3	1	2	0.25	0	0.75	2
2014	18.5.	11	2	2	0	0	0	0	2	1	0	0	1
2014	18.5.	12	9	3	6	0	0	0	6	0.333333	0.666667	0	1.5
2014	18.5.	13	11	1	0	10	10	1	2	0.0909091	0	0.909091	5.5
2014	18.5.	14	1	1	0	0	0	0	1	1	0	0	1
2014	18.5.	15	15	3	0	12	6	2	5	0.2	0	0.8	3
2014	18.5.	16	9	3	2	4	4	1	5	0.333333	0.222222	0.444444	1.8
2014	18.5.	17	13	6	0	7	7	1	7	0.461538	0	0.538462	1.85714
2014	18.5.	18	17	2	0	15	5	3	5	0.117647	0	0.882353	3.4
2014	18.5.	19	17	3	4	10	3.33333	3	8	0.176471	0.235294	0.588235	2.125
2014	18.5.	20	5	2	0	3	3	1	3	0.4	0	0.6	1.66667
2014	19.5.	6	3	3	0	0	0	0	3	1	0	0	1
2014	19.5.	7	10	3	2	5	5	1	5	0.3	0.2	0.5	2
2014	19.5.	8	0	0	0	0	0	0	0	0	0	0	0
2014	19.5.	9	5	3	2	0	0	0	4	0.6	0.4	0	1.25
2014	19.5.	10	0	0	0	0	0	0	0	0	0	0	0
2014	19.5.	11	1	1	0	0	0	0	1	1	0	0	1
2014	19.5.	12	0	0	0	0	0	0	0	0	0	0	0
2014	19.5.	13	0	0	0	0	0	0	0	0	0	0	0
2014	19.5.	14	0	0	0	0	0	0	0	0	0	0	0
2014	19.5.	15	6	1	0	5	5	1	2	0.166667	0	0.833333	3
2014	19.5.	16	1	1	0	0	0	0	1	1	0	0	1
2014	19.5.	17	0	0	0	0	0	0	0	0	0	0	0
2014	19.5.	18	0	0	0	0	0	0	0	0	0	0	0
2014	19.5.	19	0	0	0	0	0	0	0	0	0	0	0
2014	19.5.	20	0	0	0	0	0	0	0	0	0	0	0
2014	20.5.	5	2	2	0	0	0	0	2	1	0	0	1
2014	20.5.	6	3	1	2	0	0	0	2	0.333333	0.666667	0	1.5
2014	20.5.	9	0	0	0	0	0	0	0	0	0	0	0
2014	20.5.	10	0	0	0	0	0	0	0	0	0	0	0
2014	20.5.	11	0	0	0	0	0	0	0	0	0	0	0
2014	20.5.	12	0	0	0	0	0	0	0	0	0	0	0
2014	20.5.	13	0	0	0	0	0	0	0	0	0	0	0
2014	20.5.	14	1	1	0	0	0	0	1	1	0	0	1
2014	20.5.	15	0	0	0	0	0	0	0	0	0	0	0
2014	20.5.	16	0	0	0	0	0	0	0	0	0	0	0
2014	20.5.	17	0	0	0	0	0	0	0	0	0	0	0
2014	20.5.	18	0	0	0	0	0	0	0	0	0	0	0
2014	20.5.	19	0	0	0	0	0	0	0	0	0	0	0
2014	20.5.	20	0	0	0	0	0	0	0	0	0	0	0
2014	27.5.	16	3	3	0	0	0	0	3	1	0	0	1
2014	27.5.	17	5	5	0	0	0	0	5	1	0	0	1
2014	27.5.	18	3	3	0	0	0	0	3	1	0	0	1
2014	27.5.	19	5	5	0	0	0	0	5	1	0	0	1
2014	27.5.	20	2	2	0	0	0	0	2	1	0	0	1
2014	28.5.	5	8	8	0	0	0	0	8	1	0	0	1
2014	28.5.	6	9	6	0	3	3	1	7	0.666667	0	0.333333	1.28571
2014	28.5.	7	5	3	2	0	0	0	4	0.6	0.4	0	1.25
2014	28.5.	8	14	9	0	5	5	1	10	0.642857	0	0.357143	1.4
2014	28.5.	9	10	8	2	0	0	0	9	0.8	0.2	0	1.11111
2014	28.5.	10	9	7	2	0	0	0	8	0.777778	0.222222	0	1.125
2014	28.5.	11	1	1	0	0	0	0	1	1	0	0	1
2014	28.5.	12	2	2	0	0	0	0	2	1	0	0	1
2014	28.5.	13	6	3	0	3	3	1	4	0.5	0	0.5	1.5
2014	28.5.	14	3	3	0	0	0	0	3	1	0	0	1
2014	28.5.	15	4	4	0	0	0	0	4	1	0	0	1
2014	28.5.	16	6	4	2	0	0	0	5	0.666667	0.333333	0	1.2
2014	28.5.	17	2	2	0	0	0	0	2	1	0	0	1
2014	28.5.	18	19	11	4	4	4	1	14	0.578947	0.210526	0.210526	1.35714
2014	28.5.	19	7	5	2	0	0	0	6	0.714286	0.285714	0	1.16667
2014	28.5.	20	3	3	0	0	0	0	3	1	0	0	1
2014	29.5.	13	15	6	2	7	3.5	2	9	0.4	0.133333	0.466667	1.66667
2014	29.5.	14	31	10	10	11	5.5	2	17	0.322581	0.322581	0.354839	1.82353
2014	29.5.	15	42	14	0	28	5.6	5	19	0.333333	0	0.666667	2.21053
2014	29.5.	16	23	8	6	9	4.5	2	13	0.347826	0.26087	0.391304	1.76923
2014	29.5.	17	27	7	8	12	3	4	15	0.259259	0.296296	0.444444	1.8
2014	29.5.	18	31	11	4	16	4	4	17	0.354839	0.129032	0.516129	1.82353
2014	29.5.	19	4	4	0	0	0	0	4	1	0	0	1
2014	29.5.	20	29	9	4	16	8	2	13	0.310345	0.137931	0.551724	2.23077
2014	30.5.	5	67	12	8	47	4.27273	11	27	0.179104	0.119403	0.701493	2.48148
2014	30.5.	6	59	10	2	47	3.91667	12	23	0.169492	0.0338983	0.79661	2.56522
2014	30.5.	7	24	3	2	19	6.33333	3	7	0.125	0.0833333	0.791667	3.42857
2014	30.5.	8	7	5	2	0	0	0	6	0.714286	0.285714	0	1.16667
2014	30.5.	9	14	6	2	6	3	2	9	0.428571	0.142857	0.428571	1.55556
2014	30.5.	11	10	3	4	3	3	1	6	0.3	0.4	0.3	1.66667
2014	30.5.	12	4	4	0	0	0	0	4	1	0	0	1
2014	30.5.	13	2	2	0	0	0	0	2	1	0	0	1
2014	30.5.	14	7	5	2	0	0	0	6	0.714286	0.285714	0	1.16667
2014	30.5.	15	6	2	4	0	0	0	4	0.333333	0.666667	0	1.5
2014	30.5.	16	9	5	4	0	0	0	7	0.555556	0.444444	0	1.28571
2014	30.5.	17	25	7	4	14	4.66667	3	12	0.28	0.16	0.56	2.08333
2014	30.5.	18	4	2	2	0	0	0	3	0.5	0.5	0	1.33333
2014	30.5.	19	11	4	4	3	3	1	7	0.363636	0.363636	0.272727	1.57143
2014	30.5.	20	14	5	4	5	5	1	8	0.357143	0.285714	0.357143	1.75
2014	31.5.	5	10	5	0	5	5	1	6	0.5	0	0.5	1.66667
2014	31.5.	6	14	8	2	4	4	1	10	0.571429	0.142857	0.285714	1.4
2014	31.5.	7	4	4	0	0	0	0	4	1	0	0	1
2014	31.5.	8	3	1	2	0	0	0	2	0.333333	0.666667	0	1.5
2014	31.5.	9	4	4	0	0	0	0	4	1	0	0	1
2014	31.5.	10	1	1	0	0	0	0	1	1	0	0	1
2014	31.5.	11	0	0	0	0	0	0	0	0	0	0	0
2014	31.5.	12	16	3	0	13	6.5	2	5	0.1875	0	0.8125	3.2
2014	31.5.	13	4	4	0	0	0	0	4	1	0	0	1
2014	31.5.	14	10	4	6	0	0	0	7	0.4	0.6	0	1.42857
2014	31.5.	15	2	2	0	0	0	0	2	1	0	0	1
2014	31.5.	16	2	2	0	0	0	0	2	1	0	0	1
2014	31.5.	17	0	0	0	0	0	0	0	0	0	0	0
2014	31.5.	18	1	1	0	0	0	0	1	1	0	0	1
2014	31.5.	19	1	1	0	0	0	0	1	1	0	0	1
2014	31.5.	20	3	1	2	0	0	0	2	0.333333	0.666667	0	1.5
